# Supplementary material
Source: publisher figshare collection journal article supplement (https://acs.figshare.com/ndownloader/files/4185454)
Supplement: Supplementary file 1 [file 4185454]

## Supporting information

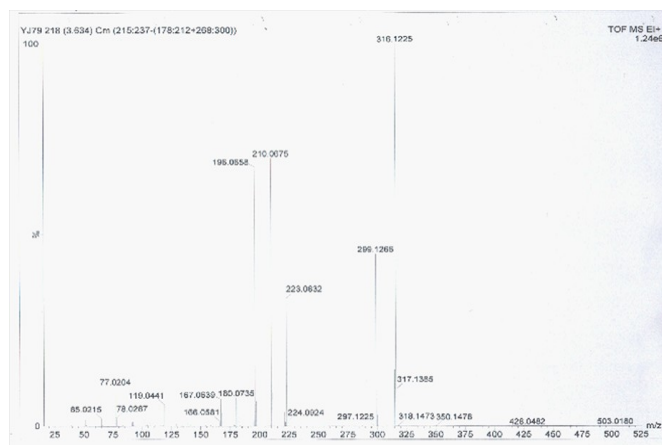

Figure S1. MS of the as-synthesized salophen

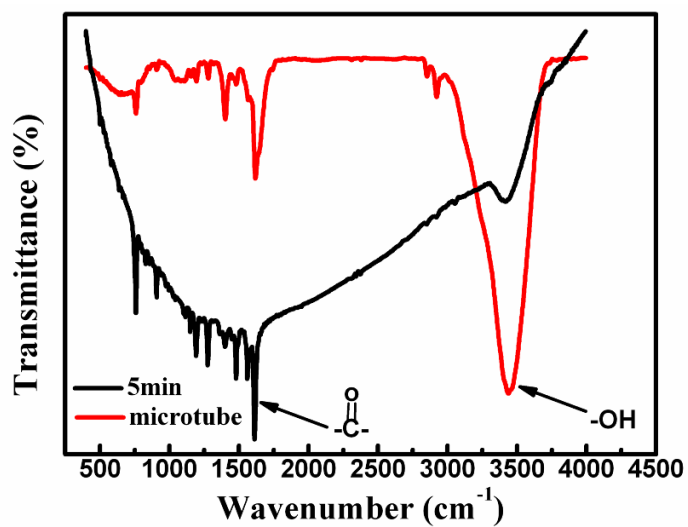

Figure S2 IR spectra of the samples collected at the ripening time of 5 min and 8 h.
